# Supplementary material for: Theoretical study on the reduction mechanism of CO2 to HCOOH on Pd3Au: an explicit solvent model is essential
Source: Royal Society of Chemistry journal article supplement (doi:10.1039/d2ta08552f), 2023-01-01
Supplement: d2ta08552f1.pdf [file d2ta08552f1.pdf]

## Supporting Information

### Theoretical study on reduction mechanism of CO<sub>2</sub> to HCOOH on Pd<sub>3</sub>Au: An explicit solvent model is essential

Ming Zheng<sup>1</sup>, Xin Zhou<sup>1\*</sup>, Yixin Wang<sup>1</sup>, Gang Chen<sup>1</sup>, Mingxia Li<sup>2\*</sup>

<sup>1</sup>MIIT Key Laboratory of Critical Materials Technology for New Energy Conversion and Storage,  
School of Chemistry and Chemical Engineering, Harbin Institute of Technology, Harbin 150001 P.

R. China

<sup>2</sup>School of Chemistry and Materials Science, Key Laboratory of Functional Inorganic Material  
Chemistry, Ministry of Education of the People's Republic of China, Heilongjiang University,

Harbin 150080, PR China

\*Corresponding author: zhoux@hit.edu.cn and limingxia@hlju.edu.cn

## Computational methods and model

### Free energy corrections

In searching for possible thermodynamic routes, all free energies ( $\Delta G$ ) were calculated by the following equation:

$$\Delta G = \Delta E_{\text{DFT}} + \Delta \text{ZPE} - T\Delta S$$

where  $\Delta E_{\text{DFT}}$  is the energy difference between reactants and products, obtained from DFT calculations;  $\Delta \text{ZPE}$  and  $\Delta S$  are the energy differences in zero-point energy and entropy;  $T$  is 298.15 K. ZPE of all adsorbates were calculated from Vibrational analysis, limited to the surface species and keeping the rest of the system fixed, was carried out by calculating the Hessian matrix with a finite difference approach with a step size of 0.015 Å. Vibrational contributions to the entropies for substrate were

considered to be inconsequential and counted as zero in the part of TΔS. For molecules, the vibrational contributions to the entropies were calculated from standard thermodynamic tables at 298.15 K and 1 atm. The proton electron pairs transfer energy involved in the reaction pathway is solved by using the computational hydrogen electrode model.

### **Adsorption energy**

Various intermediates adsorbed on different sites on the surface were considered. Generally, the adsorption sites can be classified into three types: top, bridge, and hollow sites. Hollow site includes fcc-like and hcp-like sites in close-packed crystal structure.

Adsorption energy is calculated by the following equation:

$$\Delta E_{\text{ads}} = E_{\text{adsorbate-slab}} - E_{\text{adsorbate}} - E_{\text{slab}}$$

$E_{\text{adsorbate-slab}}$  is the total energy of molecules or intermediates adsorbed on the slab surface,  $E_{\text{adsorbate}}$  and  $E_{\text{slab}}$  are energies for the isolated adsorbate and slab, respectively. It was worth noting that the intermediates are rarely adsorbed on the Au-related site, indicating that catalytic active sites were near the Pd atom. Meanwhile, the adsorption energies of fcc-like or hcp-like site were close, suggesting that the second layer has no obvious effect on the adsorbates.

### **Slab model**

In theoretical research, the Au-Pd system compounds were found at the experimentally known compositions. The UPb<sup>1, 2</sup> prototype structure (Nr40<sup>3</sup>) is predicted the most stable phase for AuPd. But experimental proof for the existence of this structure is still lacking, probably due to the low order-disorder temperature. The phase diagram of the Au-Pd system has ordered L1<sub>2</sub> structures (L1<sub>2</sub> is index by Strukturbericht designation and the prototype is AuCu<sub>3</sub> structure) for Au<sub>3</sub>Pd and AuPd<sub>3</sub> compositions, which already identified by experiment.<sup>4</sup>

In the experiment, Marco Valenti et al<sup>5</sup> measured the faradaic efficiencies for H<sub>2</sub>

of the five synthesized Pd-Au alloy electrodes at  $-0.5$  V vs RHE. The faradaic efficiencies for  $H_2$  in  $Au_{25}Pd_{75}$  is the minimum, which indicating  $Au_{25}Pd_{75}$  could effectively suppresses  $H_2$  evolution reaction (HER). In addition, with the increasing the Pd content, the partial current density of  $H_2$  decreases, which also indicate  $Au_{25}Pd_{75}$  could effectively suppress HER. It can thus be seen, when the Pd Au ratio was 1:3, the material could effectively suppress HER.

The surface segregation of Pd-Au system is a complex process, which is affected by many factors (such as temperature and adsorption molecule<sup>6, 7</sup>). Dragana D et al.<sup>8</sup> found that in the case of CO adsorption, the Au surface segregation of  $Pd_3Au$  (111) becomes endothermic, which indicates that the surface maintains a bulk composition in the presence of CO. In addition, it is reported that the surface enrichment of PdAu nano-clusters in the presence of CO is observed by Diffuse Reflectance Infrared Fourier Transform Spectroscopy (DRIFTS), and DFT calculations show that Pd atoms prefer to low-coordination at the edges of nano-clusters<sup>6</sup>. Gao et al. reported similar results using polarization modulated infrared reflectance absorption spectroscopy (PM-IRAS). When the CO pressure is higher than  $\sim 0.1$  Torr, Pd segregation is greatly enhanced, forming continuous Pd sites<sup>7</sup>. However, some experimental reports have shown that surface atoms do not segregate in the presence of strongly adsorbed species during the  $CO_2RR$ . Marco Valenti et al<sup>5</sup> collected XPS spectra of PdAu alloys before and after electrolysis at  $-0.5$  V vs RHE for 20 min. The results show that there are no significant changes in the shape of the valence band are noted, which suggests that no phase segregation occurred during the reaction that could affect the local electronic properties of the electrode surface. In addition, the CV spectrum shows that the reduction peaks of the alloy do not overlap with the pure components, indicating that there is no region containing pure Au or Pd on the surface of the alloy electrode. It can be seen that the segregation of alloys is very complex, especially in the electrochemical environment. In this work, we mainly explore the mechanism of  $CO_2$  reduction on specific electronic structure PdAu alloys, even though partial segregation of surface atoms in really experiment possible, the material still retains its specific electronic structure. Thus, the Pd-Au slab model without segregation was used in this work.

## Potential-dependent kinetic barrier

According to Chan and Nørskov<sup>9, 10</sup>, as long as there is excess charge on the electrode, the potentials applied would show some effect on the activation energies. Thus, we adopt this method to compute the barriers for on the Pd<sub>3</sub>Au (111) surface at different potentials. The parameters for determining the potential-dependent kinetic barriers for non-electrochemical reaction steps in this work were shown in Table S3. In this method, the key assumption is that the electrical double layer at the electrode surface can be approximated by a capacitor model. The relationship of a constant-charge reaction free energy to a constant-potential reaction free energy is shown below:

$$G_2(\Phi_1) - G_1(\Phi_1) = G_2(\Phi_2) - G_1(\Phi_1) + (q_2 - q_1) \times (\Phi_2 - \Phi_1)/2 \quad (1)$$

$$G_2(\Phi_2) - G_1(\Phi_2) = G_2(\Phi_2) - G_1(\Phi_1) - (q_2 - q_1) \times (\Phi_2 - \Phi_1)/2 \quad (2)$$

in which  $G_1(\Phi_1)$  and  $G_2(\Phi_2)$  represent the free energies or active barriers, which directly from the DFT calculation. “1” and “2” denote two different states, for example, “1” could be an IS, “2” could be a TS or FS, and  $q_1$  and  $q_2$  are the excess surface charges, at states 1 and 2 simulated with constant charge (where calculated by a Bader charge analysis<sup>11, 12</sup>), the  $\Phi$  is the work function. We computed the work function ( $\Phi$ ) of each state by taking the difference between the vacuum level and the system’s Fermi level.

The two data points derived via Eq. (1) and Eq. (2) allow us to establish the linear dependence of  $G$  on  $\Phi$  (as shown in Figure S10 and S11), so that we can compute the reaction free energy at any work function.

## Solvation model

When calculating thermodynamic paths, to observe interaction of various intermediates with water, continuum solvation modeling in VASPsol code<sup>13, 14</sup> was employed in this work. This implicit solvation includes the effect of electrostatics, cavitation, and dispersion on the interaction of metal surface and water.

## AIMD simulation

To evaluate the effect of dynamic h-bond network on activation energy barrier, the ab initio molecular dynamics (AIMD) with a “slow-growth” method<sup>15-17</sup> was used to sample the free energy profile. In AIMD simulation, the 40 H<sub>2</sub>O molecules were putted on Pd<sub>3</sub>Au (111) surface, the supercell dimensions are 19.283 Å, 11.133 Å and 21.356 Å. For Pd<sub>3</sub>Au (211) surface, we put 30 H<sub>2</sub>O molecules in 13.239 Å, 10.852 Å, and 21.383 Å supercells to simulate three layers of water molecules. All constrained molecular dynamics were performed Vienna Ab initio Simulation Package (VASP)<sup>18, 19</sup>. The cutoff energy of the plane-wave basis is 400 eV in the AIMD simulations. The 2×2×1 Gamma-centered k-mesh is used in Pd<sub>3</sub>Au (211) surface and 1×2×1 Gamma-centered k-mesh is used in Pd<sub>3</sub>Au (111) surface. Time step in MD is set to be 0.5 femtosecond. Projector-augmented wave (PAW) was used to account for core-valence interactions,<sup>20, 21</sup> within the exchange-correlation function was described by Perdew, Burke, and Ernzerhof (PBE)<sup>22</sup>. The D3 correction of Grimme<sup>23, 24</sup> was adopted to compensate for the lack of van der Waals interaction description in the GGA functional. The dynamic h-bond network model of Pd<sub>3</sub>Au (111) surface were shown in Figure S16.

Table S1. The atom's net charge calculated by the Bader charge analysis. (Net charge = Valence charge – Total Bader charge, the valence charges of Pd and Au are 10 and 11, respectively.)

|       | Top layer |       |        |        | 2nd layer |        |        |        |
|-------|-----------|-------|--------|--------|-----------|--------|--------|--------|
|       | 100       | 110   | 111    | 211    | 100       | 110    | 111    | 211    |
| Pd    | -0.016    | 0.027 | -0.023 | -0.053 | -0.093    | -0.058 | -0.069 | -0.080 |
| Au    | 0.164     | 0.085 | 0.160  | 0.156  | —         | —      | 0.175  | 0.123  |
| Total | 1.330     | 1.010 | 0.361  | 0.390  | -1.679    | -1.050 | -0.395 | -0.467 |

Table S2 The most favorable adsorption site, main bond length, adsorption distance ( $d_{\text{slab-adsorbate}}$ ), adsorption energies ( $E_{\text{ads}}$ ) and atom's net charge for the Pd<sub>3</sub>Au (111), (1 0 0), (1 1 0) and (2 1 1) surfaces. The units for bond length and adsorption energy are Å and eV, respectively.

|                   | Pd <sub>3</sub> Au (111)    |            | Pd <sub>3</sub> Au (100)    |            | Pd <sub>3</sub> Au (110)    |            | Pd <sub>3</sub> Au (211)    |        |
|-------------------|-----------------------------|------------|-----------------------------|------------|-----------------------------|------------|-----------------------------|--------|
|                   | site                        | t          | site                        | t          | site                        | t          | site                        | t      |
| CO <sub>2</sub> * | $d_{\text{slab-adsorbate}}$ | 3.145      | $d_{\text{slab-adsorbate}}$ | 3.137      | $d_{\text{slab-adsorbate}}$ | 3.233      | $d_{\text{slab-adsorbate}}$ | 3.218  |
|                   | C-O                         | 1.177      | C-O                         | 1.177      | C-O                         | 1.178      | C-O                         | 1.177  |
|                   | C-O                         | 1.177      | C-O                         | 1.177      | C-O                         | 1.177      | C-O                         | 1.178  |
|                   | $E_{\text{ads}}$            | -0.308     | $E_{\text{ads}}$            | -0.315     | $E_{\text{ads}}$            | -0.213     | $E_{\text{ads}}$            | -0.365 |
|                   | net charge                  | 0.037      | net charge                  | 0.039      | net charge                  | 0.036      | net charge                  | 0.151  |
| COOH*             | site                        | h          | site                        | t          | site                        | b          | site                        | t      |
|                   | $d_{\text{Pd-C}}$           | 2.151      | $d_{\text{Pd-C}}$           | 1.989      | $d_{\text{Pd-C}}$           | 1.969      | $d_{\text{Pd-C}}$           | 1.989  |
|                   | $d_{\text{Pd-O}}$           | 2.224      |                             |            | $d_{\text{Pd-O}}$           | 2.187      |                             |        |
|                   | C-O                         | 1.353      | C-O                         | 1.342      | C-O                         | 1.351      | C-O                         | 1.353  |
|                   | C-O                         | 1.257      | C-O                         | 1.212      | C-O                         | 1.238      | C-O                         | 1.195  |
|                   | $E_{\text{ads}}$            | -2.397     | $E_{\text{ads}}$            | -2.377     | $E_{\text{ads}}$            | -2.746     | $E_{\text{ads}}$            | -2.536 |
| net charge        | 0.196                       | net charge | 0.028                       | net charge | 0.134                       | net charge | 0.043                       |        |
| HCOO*             | site                        | t          | site                        | t          | site                        | t          | site                        | t      |
|                   | $d_{\text{Pd-C C}}$         | 2.145      | $d_{\text{Pd-C}}$           | 2.153      | $d_{\text{Pd-C}}$           | 2.084      | $d_{\text{Pd-C}}$           | 2.150  |
|                   | $d_{\text{Pd-C}}$           | 2.146      | $d_{\text{Pd-C}}$           | 2.174      | $d_{\text{Pd-C}}$           | 2.083      | $d_{\text{Pd-C}}$           | 2.165  |
|                   | C-O                         | 1.269      | C-O                         | 1.268      | C-O                         | 1.267      | C-O                         | 1.271  |
|                   | C-O                         | 1.269      | C-O                         | 1.269      | C-O                         | 1.267      | C-O                         | 1.271  |
|                   | $E_{\text{ads}}$            | -2.592     | $E_{\text{ads}}$            | -2.473     | $E_{\text{ads}}$            | -2.854     | $E_{\text{ads}}$            | -2.523 |
| net charge        | 0.490                       | net charge | 0.496                       | net charge | 0.483                       | net charge | 0.487                       |        |
| HCOOH*            | site                        | t          | site                        | t          | site                        | t          | site                        | t      |
|                   | C-O                         | 1.349      | C-O                         | 1.354      | C-O                         | 1.345      | C-O                         | 1.351  |
|                   | C-O                         | 1.216      | C-O                         | 1.210      | C-O                         | 1.219      | C-O                         | 1.220  |
|                   | $d_{\text{slab-adsorbate}}$ | 2.456      | $d_{\text{slab-adsorbate}}$ | 2.125      | $d_{\text{slab-adsorbate}}$ | 2.259      | $d_{\text{slab-adsorbate}}$ | 2.454  |
|                   | $E_{\text{ads}}$            | -0.534     | $E_{\text{ads}}$            | -0.502     | $E_{\text{ads}}$            | -0.581     | $E_{\text{ads}}$            | -0.674 |
| net charge        | -0.040                      | net charge | 0.039                       | net charge | -0.057                      | net charge | 0.039                       |        |
| CO*               | site                        | h          | site                        | b          | site                        | b          | site                        | h      |

|                   |        |                             |        |                   |        |                   |        |
|-------------------|--------|-----------------------------|--------|-------------------|--------|-------------------|--------|
| $d_{\text{Pd-C}}$ | 2.065  | $d_{\text{Pd-C}}$           | 1.953  | $d_{\text{Pd-C}}$ | 2.028  | $d_{\text{Pd-C}}$ | 2.063  |
| $d_{\text{Pd-C}}$ | 2.066  | $d_{\text{Au-C}}$           | 2.126  | $d_{\text{Pd-C}}$ | 2.025  | $d_{\text{Pd-C}}$ | 2.065  |
| $d_{\text{Pd-C}}$ | 2.072  | $d_{\text{slab-adsorbate}}$ |        |                   |        | $d_{\text{Pd-C}}$ | 2.051  |
| C-O               | 1.192  | C-O                         | 1.175  | C-O               | 1.187  | C-O               | 1.206  |
| $E_{\text{ads.}}$ | -2.225 | $E_{\text{ads.}}$           | -1.656 | $E_{\text{ads.}}$ | -1.913 | $E_{\text{ads.}}$ | -2.204 |
| net charge        | 0.209  | net charge                  | 0.102  | net charge        | 0.166  | net charge        | 0.216  |

Table S3 Parameters for determining the potential-dependent kinetic barriers (eV) for all non-electrochemical steps in this work.

| Index | surface | Reaction Steps                         | $\Delta q(\text{TS-IS})$ | $\Delta q(\text{FS-IS})$ | $\Delta\Phi(\text{TS-IS})$ | $\Delta\Phi(\text{FS-IS})$ | $E_{\text{act}}$<br>(0 V) | $E_{\text{act}}$<br>(-0.4/-0.33 V) |
|-------|---------|----------------------------------------|--------------------------|--------------------------|----------------------------|----------------------------|---------------------------|------------------------------------|
| 1     | 111     | $\text{CO}_2 \rightarrow \text{COOH}$  | -0.28                    | -0.39                    | 0.00                       | -0.01                      | 0.71                      | 0.30                               |
| 2     |         | $\text{CO}_2 \rightarrow \text{HCOO}$  | -0.10                    | -0.08                    | -0.02                      | -0.04                      | 0.96                      | 0.92                               |
| 3     |         | $\text{COOH} \rightarrow \text{HCOOH}$ | -0.12                    | -0.12                    | 0.05                       | -0.08                      | 0.58                      | 0.53                               |
| 4     |         | $\text{HCOO} \rightarrow \text{HCOOH}$ | -0.20                    | -0.60                    | 0.03                       | -0.06                      | 0.64                      | 0.56                               |
| 5     | 211     | $\text{CO}_2 \rightarrow \text{COOH}$  | -0.31                    | -0.33                    | -0.04                      | 0.01                       | 0.55                      | 0.46                               |
| 6     |         | $\text{CO}_2 \rightarrow \text{HCOO}$  | -0.04                    | -0.02                    | -0.01                      | -0.11                      | 0.51                      | 0.49                               |
| 7     |         | $\text{COOH} \rightarrow \text{HCOOH}$ | 0.20                     | 0.17                     | 0.11                       | -0.18                      | 0.53                      | 0.45                               |
| 8     |         | $\text{HCOO} \rightarrow \text{HCOOH}$ | -0.27                    | -0.58                    | -0.03                      | -0.10                      | 0.54                      | 0.44                               |

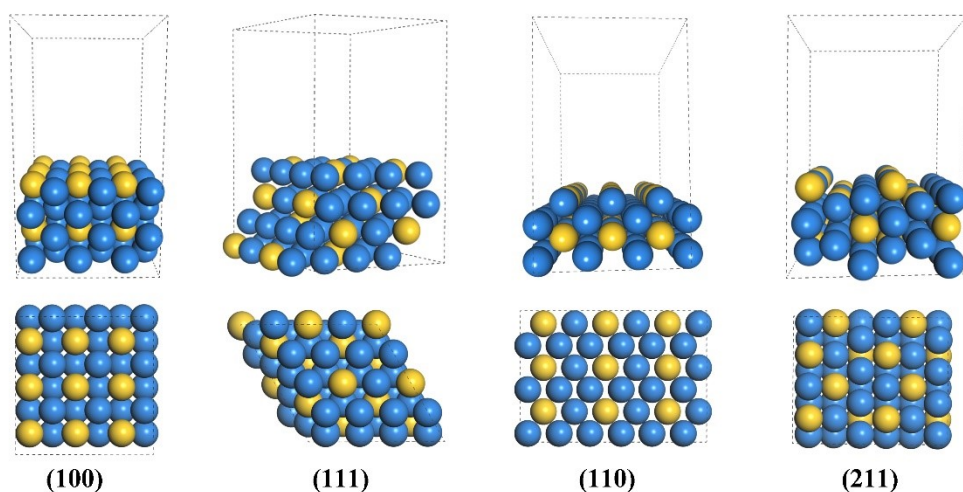

Figure S1 The optimized structures of different Pd<sub>3</sub>Au facets (the blue ball represents Pd atom and yellow ball represents Au atom).

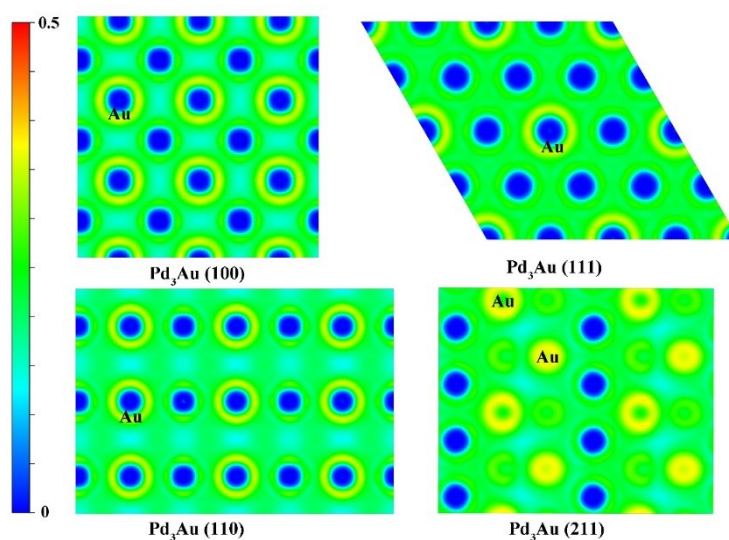

Figure S2 The isosurface of electron localization function on the Pd<sub>3</sub>Au (100), (111), (110) and (211) surface. (isosurface level = 0.5)



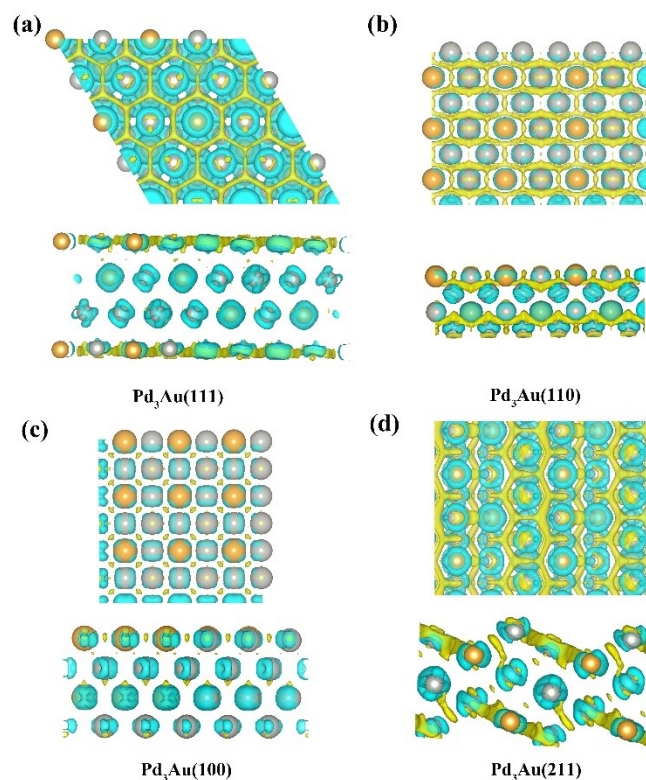

Figure S3 The deformation charge density distribution of the Pd<sub>3</sub>Au (100), (111), (110) and (211) surface. Yellow and blue areas denote electron accumulation and depletion, respectively, with isosurface values of  $5 \times 10^{-5} e/\text{\AA}^3$

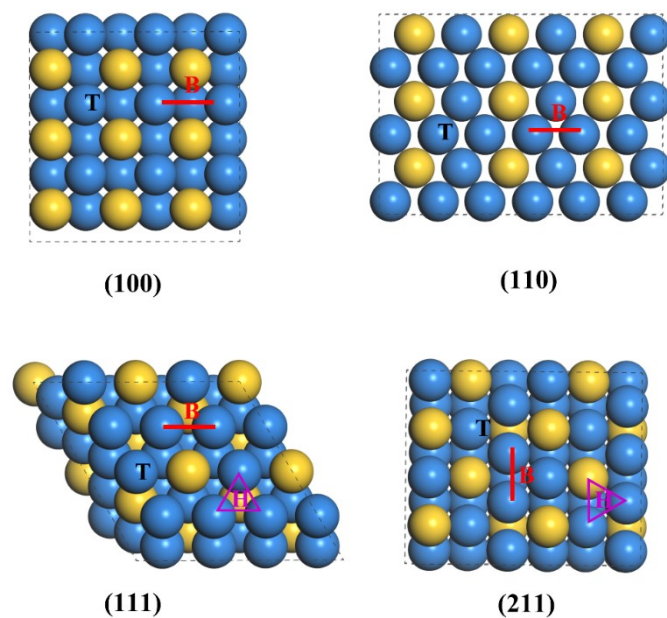

Figure S4 The top views of (1 1 1), (1 0 0), (1 1 0) and (2 1 1) facet surface structure of Pd<sub>3</sub>Au. The investigated adsorption sites are marked by different letters in the top views. (The blue ball represents Pd atom and yellow ball represents Au atom, and the adsorption sites can be classified into three types: top (" T "), bridge (" B "), and hollow (" H ") sites)

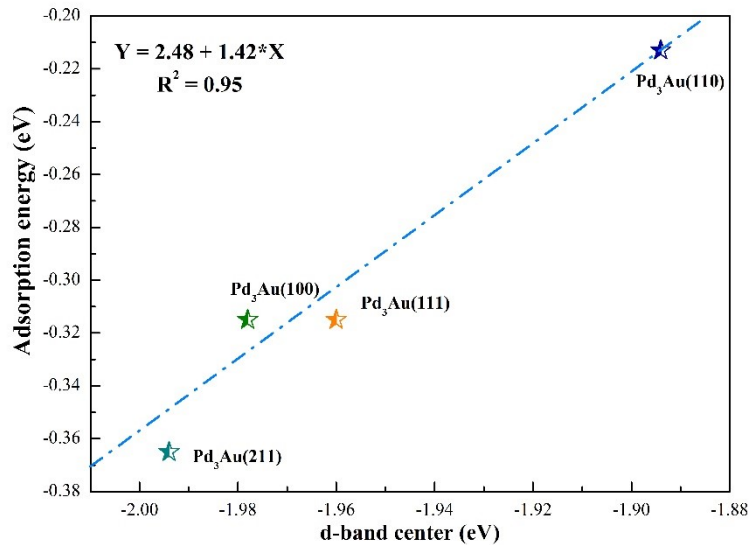

Figure S5 The relationship for Pd<sub>3</sub>Au surfaces between d-band center and adsorption energy of CO<sub>2</sub>.

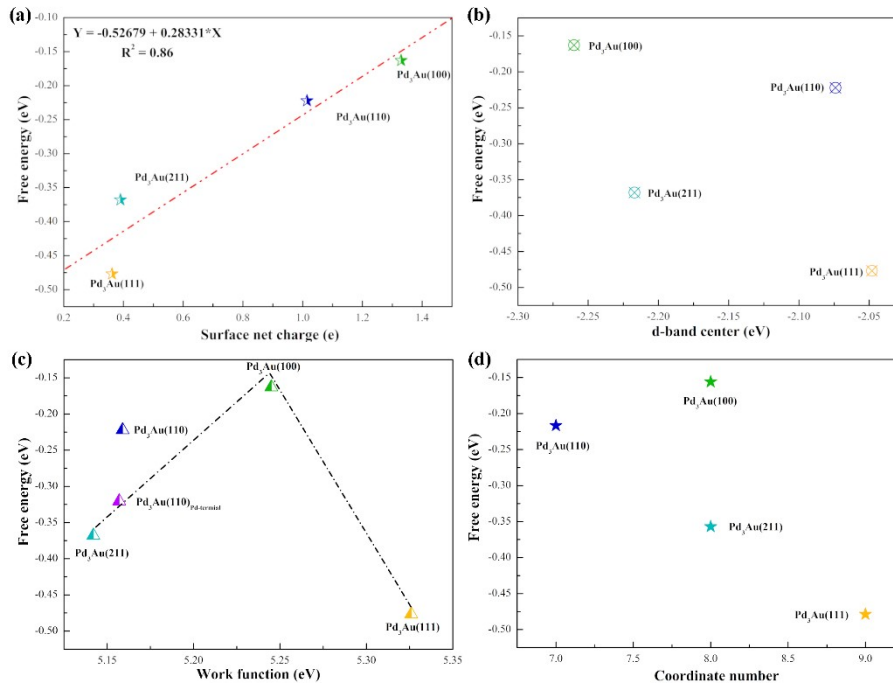

Figure S6 The relationship for Pd<sub>3</sub>Au surfaces between  $\Delta G_{H^*}$  and (a) the surface net charge, (b) d-band center (c) the work function, (d) the coordination number.

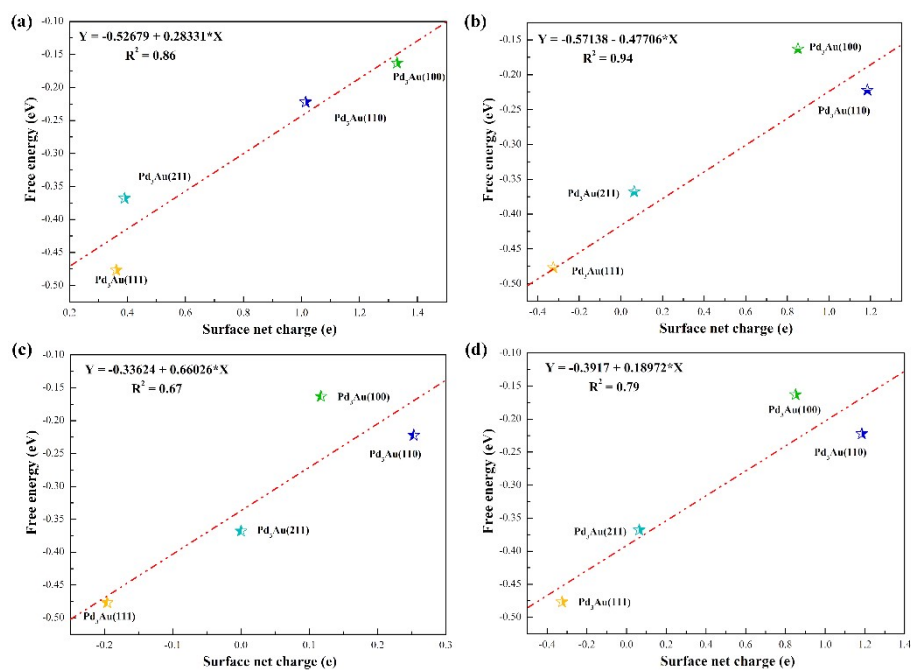

Figure S7 The relationship between the surface net charge (a) Bader charge, (b) DDEC6 charge (c) Hirshfeld charge, (d) Hirshfeld-I charge and Gibbs free energy.

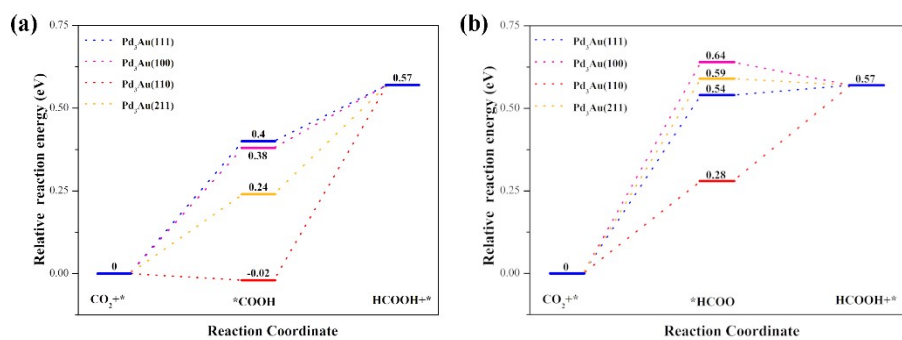

Figure S8 The energy diagram of reduction  $\text{CO}_2$  to  $\text{HCOOH}$  via (a)  $\text{COOH}^*$  and (b)  $\text{HCOO}^*$  routes at the zero-electrode potential ( $U = 0 \text{ V}$ );

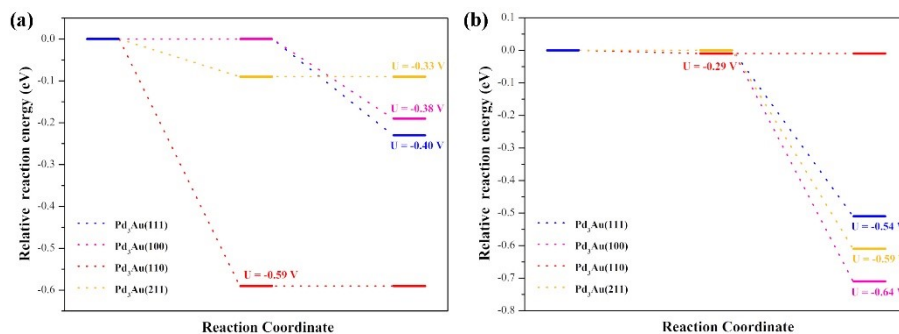

Figure S9 The (a)  $\text{COOH}^*$  and (b)  $\text{HCOO}^*$  routes at the onset potential over  $\text{Pd}_3\text{Au}$  (1 1 1), (1 0 0), (1 1 0) and (2 1 1) surfaces, respectively.

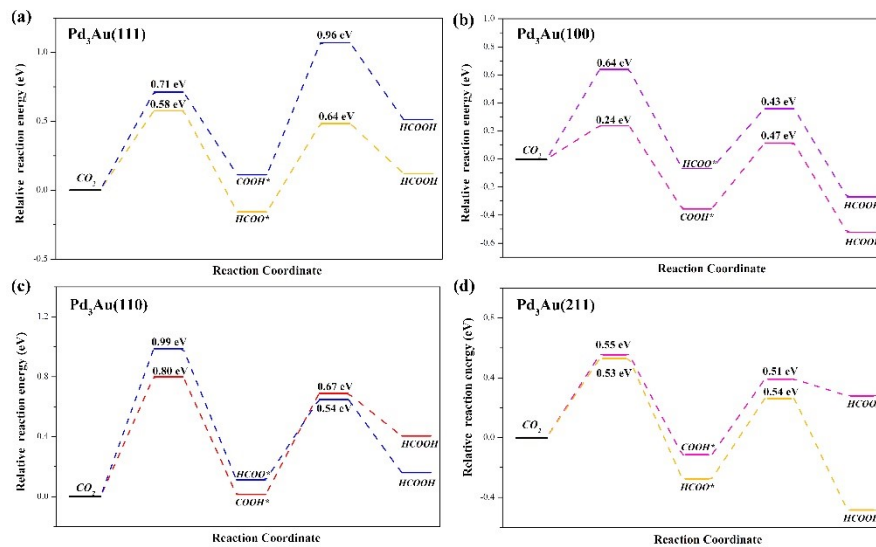

Figure S10 Kinetic barrier diagram for formic acid production on (a) Pd<sub>3</sub>Au (111), (b) Pd<sub>3</sub>Au (100), (c) Pd<sub>3</sub>Au (110), (d) Pd<sub>3</sub>Au (211).

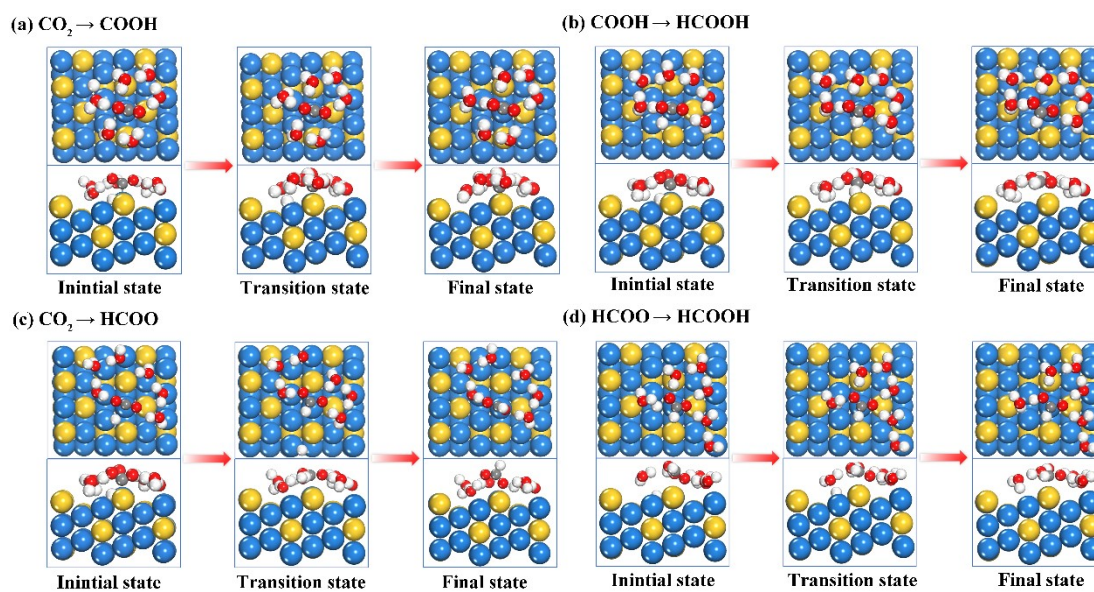

Figure S11 Optimized structures of the initial, transition, and final states involved in (a) COOH\* route and (b) HCOO\* route on Pd<sub>3</sub>Au (211).

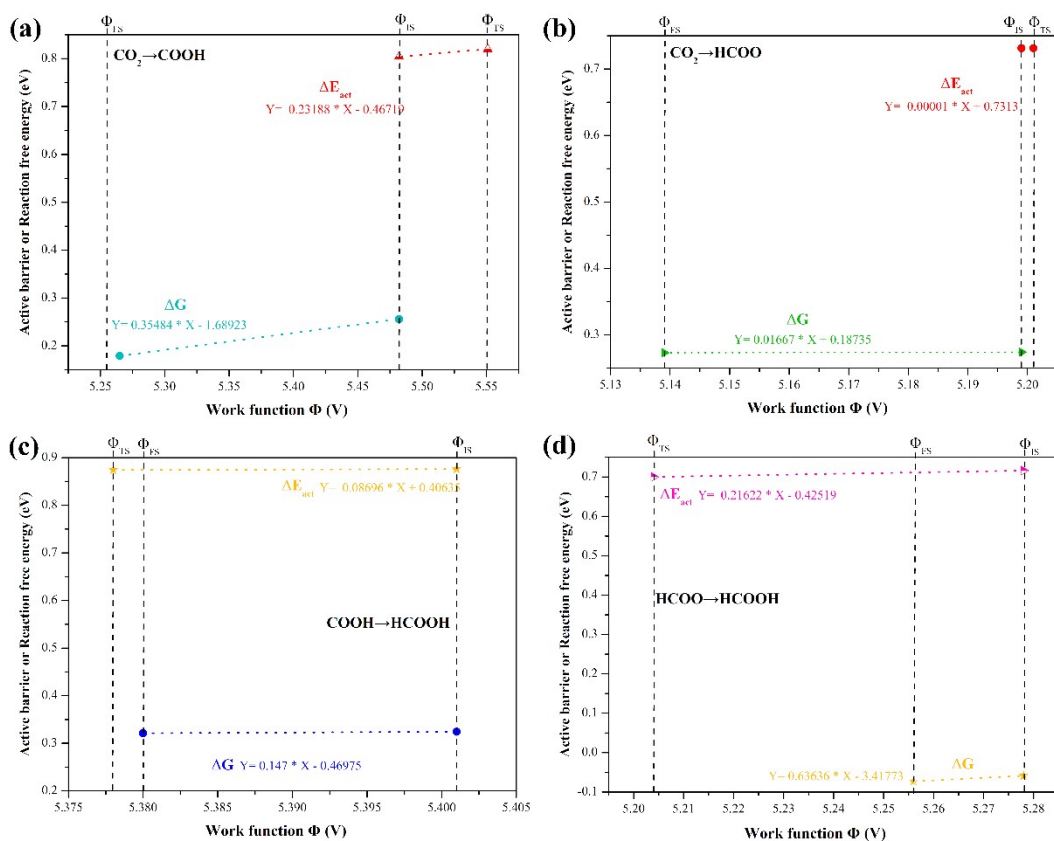

Figure S12. Potential-dependent reaction free energy ( $\Delta G$ ) and activation barrier ( $\Delta E_{act}$ ) on PdAu (111) for (a)  $CO_2 \rightarrow COOH$ , (b)  $CO_2 \rightarrow HCOO$ , (c)  $COOH \rightarrow HCOOH$ , (d)  $HCOO \rightarrow HCOOH$ .

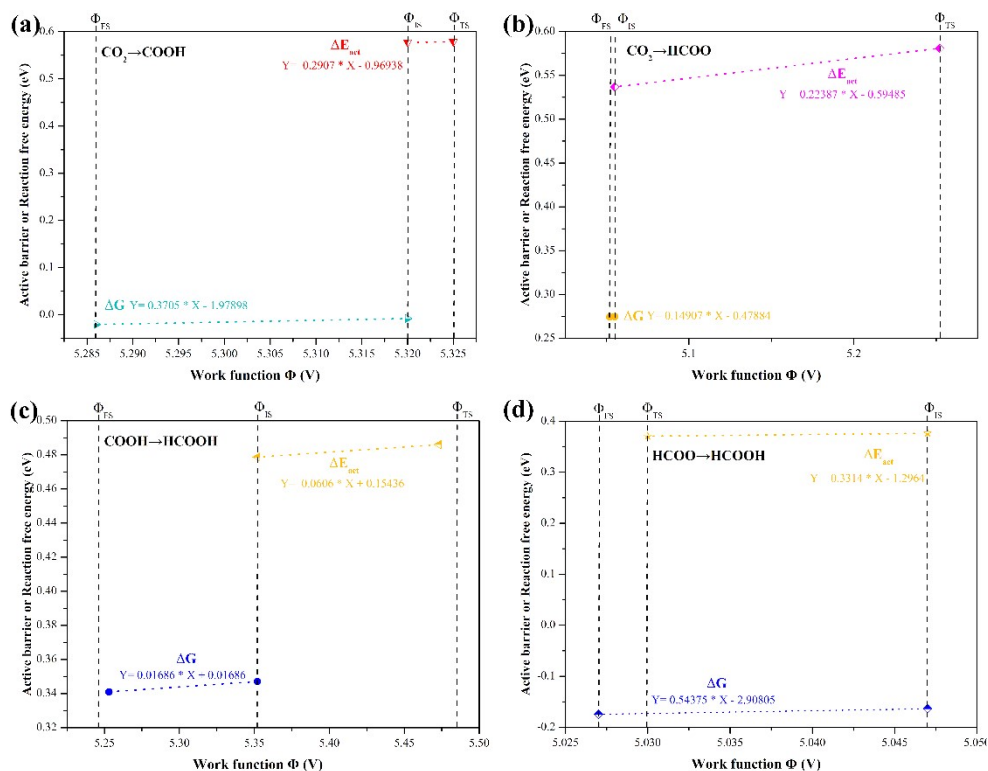

Figure S13. Potential-dependent reaction free energy ( $\Delta G$ ) and activation barrier ( $\Delta E_{act}$ ) on Pd<sub>3</sub>Au (211) for (a)  $CO_2 \rightarrow COOH$ , (b)  $CO_2 \rightarrow HCOO$ , (c)  $COOH \rightarrow HCOOH$ , (d)  $HCOO \rightarrow HCOOH$ .

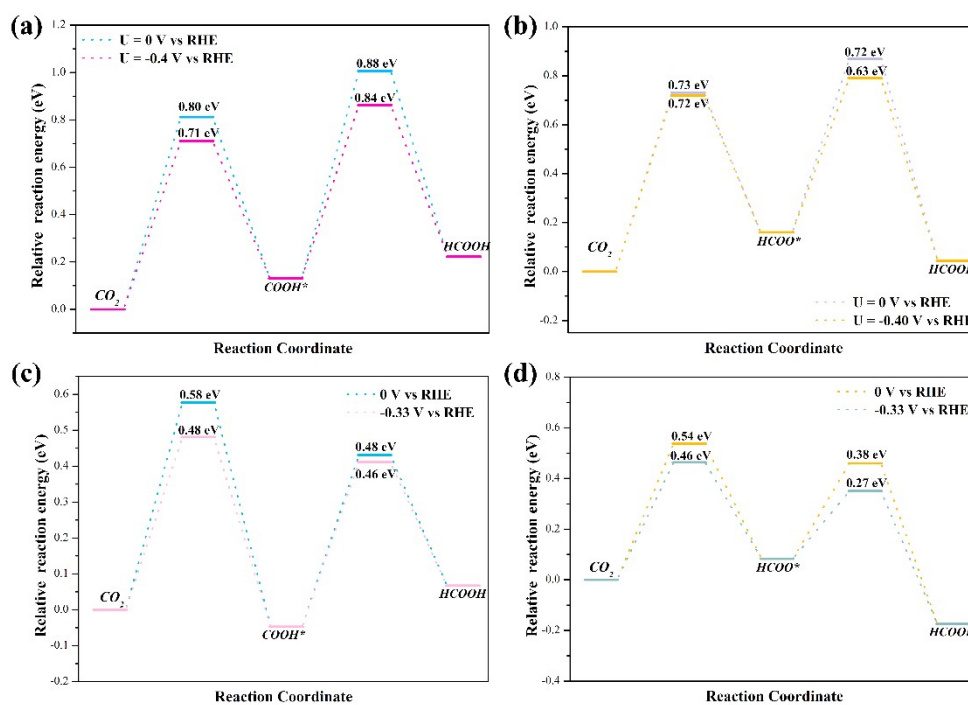

Figure S14 The path of HCOOH formation on the Pd<sub>3</sub>Au (111) surface through (a) COOH\* routes and (b) HCOO\* routes at 0 V and -0.40 V vs RHE; The path of HCOOH formation on the Pd<sub>3</sub>Au (211) surface through (c) COOH\* routes and (d) HCOO\* routes at 0V and -0.33 V vs RHE.

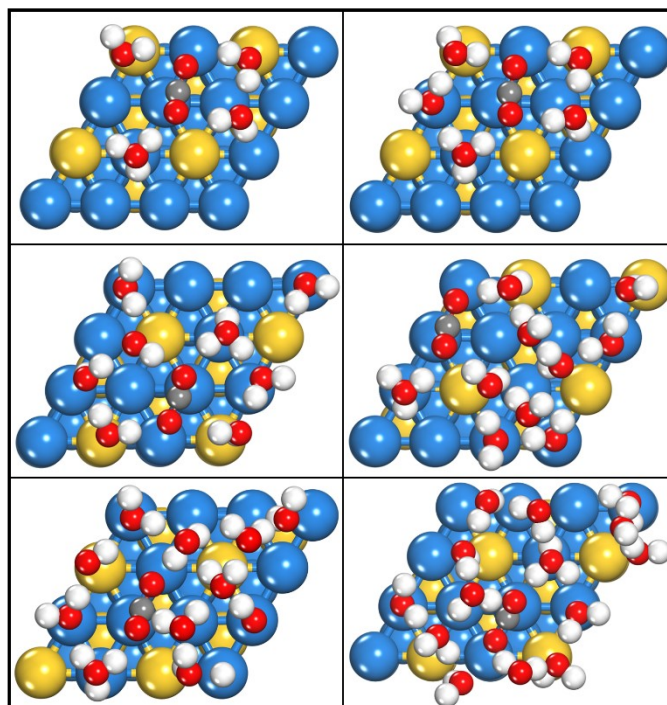

Figure S15 The Transition state structure of  $\text{CO}_2 + \text{H}^+ + \text{e}^- \rightarrow \text{COOH}^*$  with different water molecules model on Pd<sub>3</sub>Au (111).

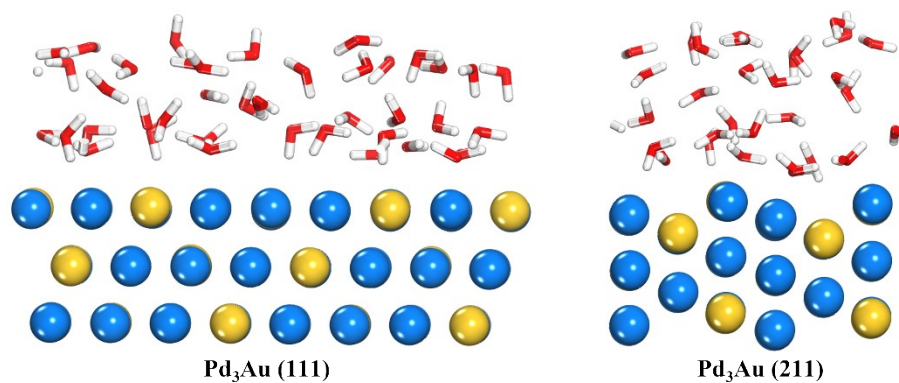

Figure S16 The dynamic h-bond network model of Pd<sub>3</sub>Au (111) and (211) surface

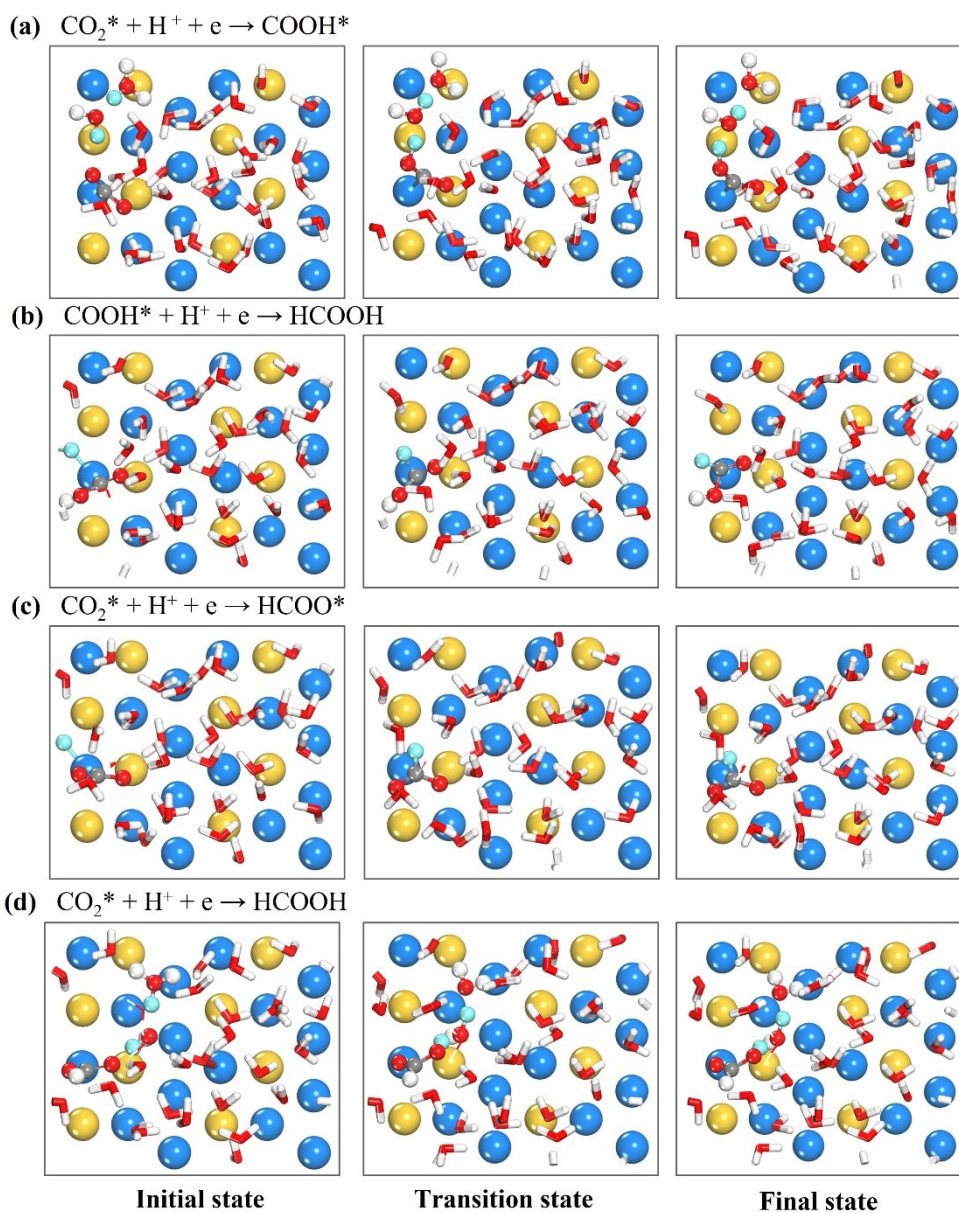

Figure S17 Representative snapshots of the structural evolution of (a)  $\text{CO}_2^* \rightarrow \text{COOH}^*$ , (b)  $\text{COOH}^* \rightarrow \text{HCOOH}$ , (c)  $\text{CO}_2^* \rightarrow \text{HCOO}^*$ , and (d)  $\text{HCOO}^* \rightarrow \text{HCOOH}$  on Pd<sub>3</sub>Au (211).

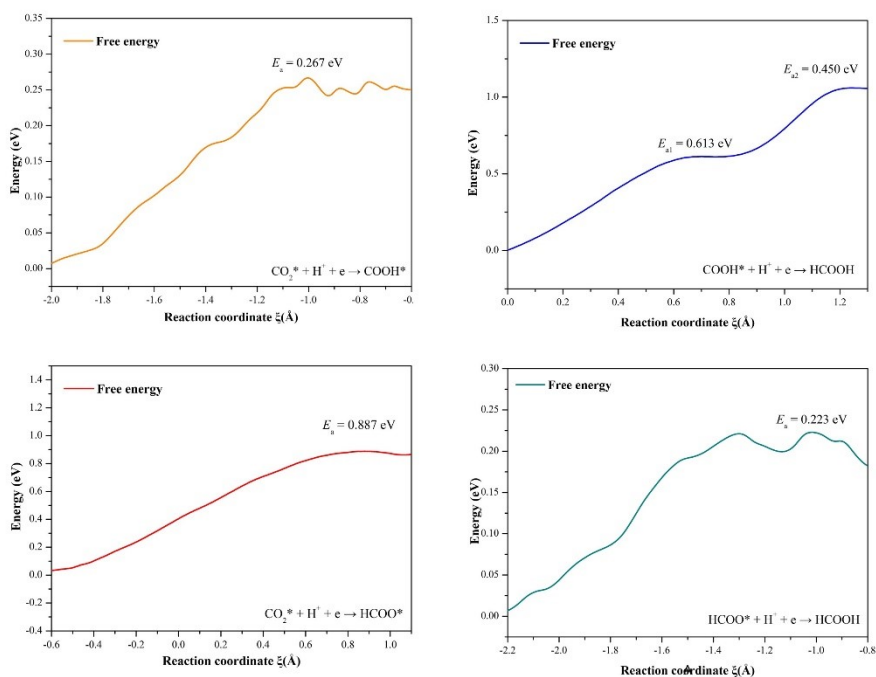

Figure S18 The free energy profiles obtained by integration along the reaction coordinate on Pd<sub>3</sub>Au (111).

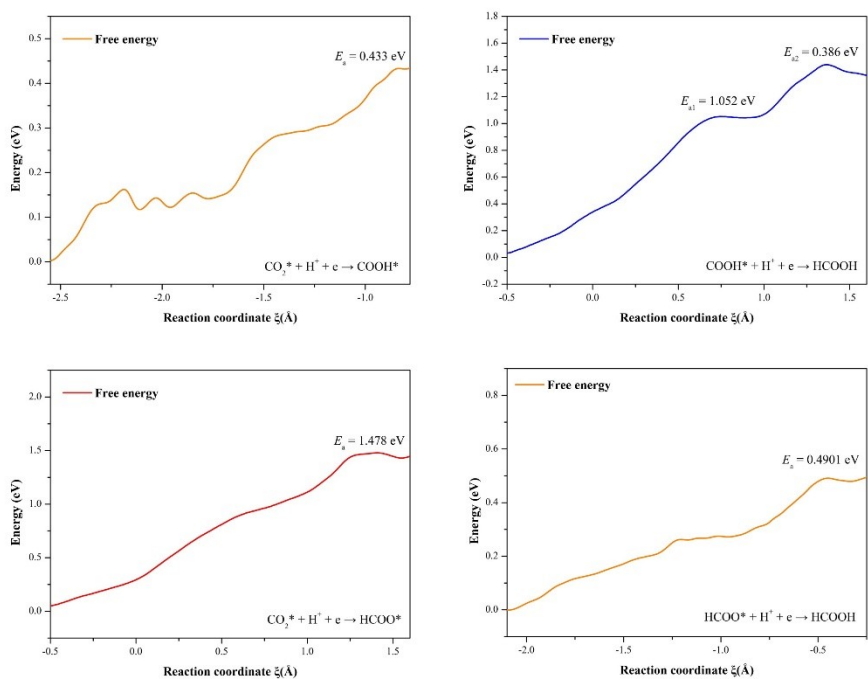

Figure S19 The free energy profiles obtained by integration along the reaction coordinate on Pd<sub>3</sub>Au (211).



## References

1. D. Y. Jo, H. C. Ham and K.-Y. Lee, *Applied Surface Science*, 2020, **527**, 146857.
2. A. Brown, *Acta Crystallographica*, 1961, **14**, 856-860.
3. J. Kanamori and Y. Kakehashi, <http://dx.doi.org/10.1051/jphyscol:1977754>, 1977, **38**.
4. M. H. F. Sluiter, C. Colinet and A. Pasturel, *Physical Review B*, 2006, **73**, 174204.
5. M. Valenti, N. P. Prasad, R. Kas, D. Bohra, M. Ma, V. Balasubramanian, L. Chu, S. Gimenez, J. Bisquert, B. Dam and W. A. Smith, *ACS Catalysis*, 2019, **9**, 3527-3536.
6. B. Zhu, G. Thrimurthulu, L. Delannoy, C. Louis, C. Mottet, J. Creuze, B. Legrand and H. Guesmi, *Journal of Catalysis*, 2013, **308**, 272-281.
7. F. Gao, Y. Wang and D. W. Goodman, *The Journal of Physical Chemistry C*, 2009, **113**, 14993-15000.
8. D. D. Vasić Anićijević, V. M. Nikolić, M. P. Marčeta Kaninski and I. A. Pašti, *International Journal of Hydrogen Energy*, 2015, **40**, 6085-6096.
9. K. Chan and J. K. Nørskov, *The Journal of Physical Chemistry Letters*, 2015, **6**, 2663-2668.
10. K. Chan and J. K. Nørskov, *The Journal of Physical Chemistry Letters*, 2016, **7**, 1686-1690.
11. R. F. W. Bader, *Chemical Reviews*, 1991, **91**, 893-928.
12. W. Tang, E. Sanville and G. Henkelman, *Journal of Physics: Condensed Matter*, 2009, **21**, 084204.
13. K. Mathew, R. Sundararaman, K. Letchworth-Weaver, T. A. Arias and R. G. Hennig, *Journal of Chemical Physics*, 2014, **140**.
14. K. Mathew, V. S. C. Kolluru, S. Mula, S. N. Steinmann and R. G. Hennig, *Journal of Chemical Physics*, 2019, **151**.
15. T. K. Woo, P. M. Margl, P. E. Blöchl and T. Ziegler, *The Journal of Physical Chemistry B*, 1997, **101**, 7877-7880.
16. H. Oberhofer, C. Dellago and P. L. Geissler, *The Journal of Physical Chemistry B*, 2005, **109**, 6902-6915.
17. C. Jarzynski, *Physical Review Letters*, 1997, **78**, 2690-2693.
18. J. Hafner, *Ab-initio simulations of materials using VASP: Density-functional theory and beyond*, 2008.
19. G. Kresse and J. Furthmüller, *Physical Review B*, 1996, **54**, 11169-11186.
20. G. Kresse and D. Joubert, *Physical Review B*, 1999, **59**, 1758-1775.
21. P. E. Blochl, *Physical Review B*, 1994, **50**, 17953-17979.
22. J. P. Perdew, K. Burke and M. Ernzerhof, *Physical Review Letters*, 1996, **77**, 3865-3868.
23. S. Grimme, S. Ehrlich and L. Goerigk, *Journal of Computational Chemistry*, 2011, **32**, 1456-1465.
24. S. Grimme, J. Antony, S. Ehrlich and H. J. J. o. C. P. Krieg, 2010, **132**, 154104.
